# Supplementary material
Source: publisher figshare collection journal article supplement (https://diabetesjournals.figshare.com/ndownloader/files/24136121)

## Online-Only Supplemental Table of Contents

**Supplemental Table S1: Metabolic Syndrome Characteristics in non-Hispanic Black Patients**

**Supplemental Table S2: Multivariable Analyses, Metabolic Syndrome vs Non-Metabolic Syndrome in non-Hispanic Black Patients**

**Supplemental Table S3: Inflammatory Markers stratified by cutoff levels**

**Supplemental Table S4: Inflammatory Markers stratified by cutoff levels in non-Hispanic Black Patients**

**Supplemental Figure S1: Forrest plot of MetS and individual MetS components in Black patients.** Multivariable regression analysis for MetS itself and separate analyses for MetS components were performed in Black Patients. All analyses were adjusted for age, sex, race/ethnicity, hospital site, and the Charlson Comorbidity Index. MetS=Metabolic Syndrome, HTN=Hypertension, DM=Diabetes Mellitus, TG=Triglycerides, HDL=High Density Lipoprotein.

**Supplemental Figure S2: Forrest plot of MetS along with inflammatory markers on primary and secondary outcomes** Separate multivariable regression analyses for MetS and each inflammatory marker (CRP, LDH, and ferritin) adjusted for age, sex, race/ethnicity, hospital site, and the Charlson Comorbidity Index. MetS=Metabolic Syndrome. Previously described cutoff values shown to correlate with increased disease severity or mortality in COVID-19 were used: CRP > 41.2 mg/L,<sup>22</sup> LDH > 365 U/L,<sup>22</sup> and Ferritin > 300 ng/mL.<sup>1</sup>

**Supplemental Figure S3: Forrest plot of MetS along with inflammatory markers in Black patients.** Separate multivariable regression analyses for MetS and each inflammatory marker (CRP, LDH, and ferritin) adjusted for age, sex, race/ethnicity, hospital site, and the Charlson Comorbidity Index. MetS=Metabolic Syndrome. Previously described cutoff values shown to correlate with increased disease severity or mortality in COVID-19 were used: CRP>41.2 mg/L<sup>22</sup>, LDH>365 U/L<sup>22</sup>, and Ferritin>300 ng/mL.<sup>1</sup>

**Supplemental Table S1: Metabolic Syndrome Characteristics in non-Hispanic Black Patients**

| Characteristics                                                   | MetS (n=171)         | Non-MetS (n=74)    | p-value |
|-------------------------------------------------------------------|----------------------|--------------------|---------|
| Age, Mean $\pm$ SD - yr                                           | 61.2 $\pm$ 13.7      | 59.7 $\pm$ 15.1    | 0.4712  |
| Female, no. (%)                                                   | 100 (58.5)           | 38 (51.4)          | 0.3017  |
| BMI <sup>b</sup> , Mean $\pm$ SD - kg/m <sup>2</sup>              | 35.7 $\pm$ 8.4       | 31.4 $\pm$ 8.0     | 0.0003  |
| Charlson Index Score, Mean $\pm$ SD                               | 3.9 $\pm$ 2.3        | 2.5 $\pm$ 2.0      | <0.0001 |
| <b>MetS Diagnoses - no. (%)</b>                                   |                      |                    |         |
| Prediabetes/Diabetes <sup>c</sup>                                 | 152 (88.9)           | 24 (32.4)          | <0.0001 |
| Obesity <sup>d</sup>                                              | 127 (74.3)           | 41 (55.4)          | 0.0035  |
| Hypertension <sup>e</sup>                                         | 161 (94.2)           | 44 (59.5)          | <0.0001 |
| Triglycerides > 150 mg/dL                                         | 37/129 (28.7)        | 1/20 (5.0)         | 0.0259  |
| Low HDL <sup>f</sup>                                              | 126 (73.7)           | 6 (8.1)            | <0.0001 |
| <b>Laboratory Values, mean <math>\pm</math> SD (no. measured)</b> |                      |                    |         |
| Ferritin ng/mL                                                    | 871 $\pm$ 1194 (164) | 858 $\pm$ 953 (72) | 0.9251  |
| C-reactive protein mg/L                                           | 126 $\pm$ 86 (160)   | 104 $\pm$ 89 (72)  | 0.0753  |
| Lactate Dehydrogenase U/L                                         | 405 $\pm$ 160 (161)  | 394 $\pm$ 182 (72) | 0.6516  |

<sup>a</sup>Includes Hispanic, Asian, and Unknown, <sup>b</sup>The Body Mass Index (BMI) is weight in kilograms divided by the square of height in meters, <sup>c</sup>Prediabetes defined by WHO criteria: hemoglobin A1C  $\geq$  5.7, or documented hx of DM or on diabetic medication <sup>d</sup>BMI > 30 kg/m<sup>2</sup>, <sup>e</sup>defined as history of HTN or anti-hypertensive medication, <sup>f</sup>High Density Lipoprotein (HDL) < 50 mg/dL for women and < 40 mg/dL for men or those on a statin with documented history of hyperlipidemia.

**Supplemental Table S2: Multivariable Analyses, Metabolic Syndrome vs Non-Metabolic Syndrome in non-Hispanic Black Patients**

| Outcomes                                                                                                                                                                                                                                                                                                                | MetS<br>(n=171) | Non MetS<br>(n=74) | Risk Difference,<br>% (95% CI) | Adjusted OR <sup>a</sup> (95% CI) | P-value |
|-------------------------------------------------------------------------------------------------------------------------------------------------------------------------------------------------------------------------------------------------------------------------------------------------------------------------|-----------------|--------------------|--------------------------------|-----------------------------------|---------|
| Hospital Mortality - no. (%)                                                                                                                                                                                                                                                                                            | 48 (25.5)       | 10 (10.1)          | 14.6 (4.3, 24.9)               | 3.304 (1.31-8.32)                 | 0.0112  |
| ICU Required - no. (%)                                                                                                                                                                                                                                                                                                  | 96 (56.1)       | 22 (29.7)          | 26.4 (13.6, 39.2)              | 3.679 (1.94-6.99)                 | <0.0001 |
| ARDS <sup>b</sup> - no. (%)                                                                                                                                                                                                                                                                                             | 64 (37.4)       | 11 (14.9)          | 22.6 (11.7, 33.4)              | 3.908 (1.82-8.40)                 | 0.0005  |
| IMV - no. (%)                                                                                                                                                                                                                                                                                                           | 80 (46.8)       | 16 (21.6)          | 25.2 (13.2, 37.2)              | 3.683 (1.86-7.29)                 | 0.0002  |
| Length of Stay, mean $\pm$ SD, d                                                                                                                                                                                                                                                                                        | 14.0 $\pm$ 10.6 | 10.6 $\pm$ 8.9     | n/a                            | n/a                               | 0.0181  |
| Length of Stay, median (IQR), d                                                                                                                                                                                                                                                                                         | 11 (6, 19)      | 8 (4, 14)          | n/a                            | n/a                               | 0.0548  |
| Hospital Readmission no., %                                                                                                                                                                                                                                                                                             | 16/128 (12.5)   | 4/67 (5.97)        | 6.5 (-1.5, 14.6)               | 1.471 (0.43-5.06)                 | 0.5402  |
| <sup>a</sup> Multivariable Logistic Regression Model adjusted for Age, Sex, Race, Hospital Site, and Charlson Comorbidity Index. <sup>b</sup> Acute Respiratory Distress Syndrome (ARDS) defined according to Berlin Definition. ICU=Intensive Care Unit; MetS=Metabolic Syndrome; IMV=Invasive Mechanical Ventilation. |                 |                    |                                |                                   |         |

**Supplemental Table S3: Inflammatory Markers stratified by cutoff levels**

| Inflammatory markers - no. (%)                                                                                                                 | MetS       | Non-MetS  | p-value |
|------------------------------------------------------------------------------------------------------------------------------------------------|------------|-----------|---------|
| <b>Ferritin &gt; 300 ng/mL (n=201/284)<sup>a</sup></b>                                                                                         | 136 (67.7) | 65 (32.3) | 0.2046  |
| <b>LDH &gt; 365 U/L (n=123/173)<sup>b</sup></b>                                                                                                | 89 (72.4)  | 34 (27.6) | 0.0184  |
| <b>CRP &gt; 41.2 mg/L (n=208/270)<sup>c</sup></b>                                                                                              | 150 (72.1) | 58 (27.9) | <0.0001 |
| <i>MetS=Metabolic Syndrome. <sup>a</sup>Reference: Zhou F, Yu T, Du R, et al. <sup>b</sup>Reference: Yan L, Zhang H-T, Goncalves J, et al.</i> |            |           |         |

**Supplemental Table S4: Inflammatory Markers stratified by cutoff levels in non-Hispanic Black Patients**

| Inflammatory markers - no. (%)                                                                                                                   | MetS       | Non-MetS  | p-value |
|--------------------------------------------------------------------------------------------------------------------------------------------------|------------|-----------|---------|
| <b>Ferritin &gt; 300 ng/mL (n=181/236)<sup>a</sup></b>                                                                                           | 127 (70.2) | 57 (29.8) | 0.6832  |
| <b>LDH &gt; 365 U/L (n=111/233)<sup>b</sup></b>                                                                                                  | 80 (72.1)  | 31 (27.9) | 0.3488  |
| <b>CRP &gt; 41.2 mg/L (n=186/232)<sup>c</sup></b>                                                                                                | 138 (74.2) | 48 (25.8) | 0.0005  |
| <i>MetS=Metabolic Syndrome. <sup>a</sup>Reference: Zhou F, Yu T, Du R, et al. <sup>b,c</sup>Reference: Yan L, Zhang H-T, Goncalves J, et al.</i> |            |           |         |

**Supplemental Figure S1: Forrest plot of MetS and individual MetS components in Black patients.** Multivariable regression analysis for MetS itself and separate analyses for MetS components were performed in Black patients. All analyses were adjusted for age, sex, race/ethnicity, hospital site, and the Charlson Comorbidity Index. MetS=Metabolic Syndrome, HTN=Hypertension, DM=Diabetes Mellitus, TG=Triglycerides, HDL=High Density Lipoprotein.

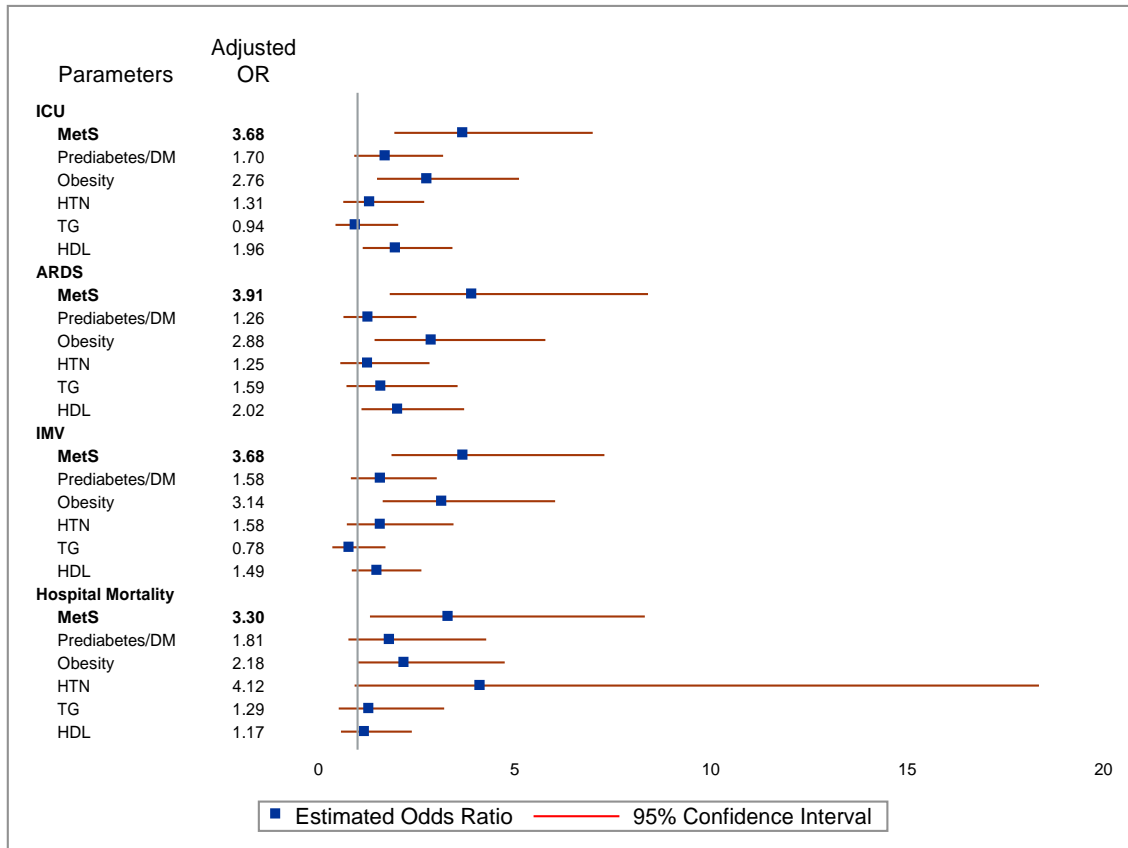

**Supplemental Figure S2: Forrest plot of MetS along with inflammatory markers on primary and secondary outcomes** Separate multivariable regression analyses for MetS and each inflammatory marker (CRP, LDH, and ferritin) adjusted for age, sex, race/ethnicity, hospital site, and the Charlson Comorbidity Index. MetS=Metabolic Syndrome. Previously described cutoff values shown to correlate with increased disease severity or mortality in COVID-19 were used: CRP > 41.2 mg/L,<sup>22</sup> LDH > 365 U/L,<sup>22</sup> and Ferritin > 300 ng/mL.<sup>1</sup>

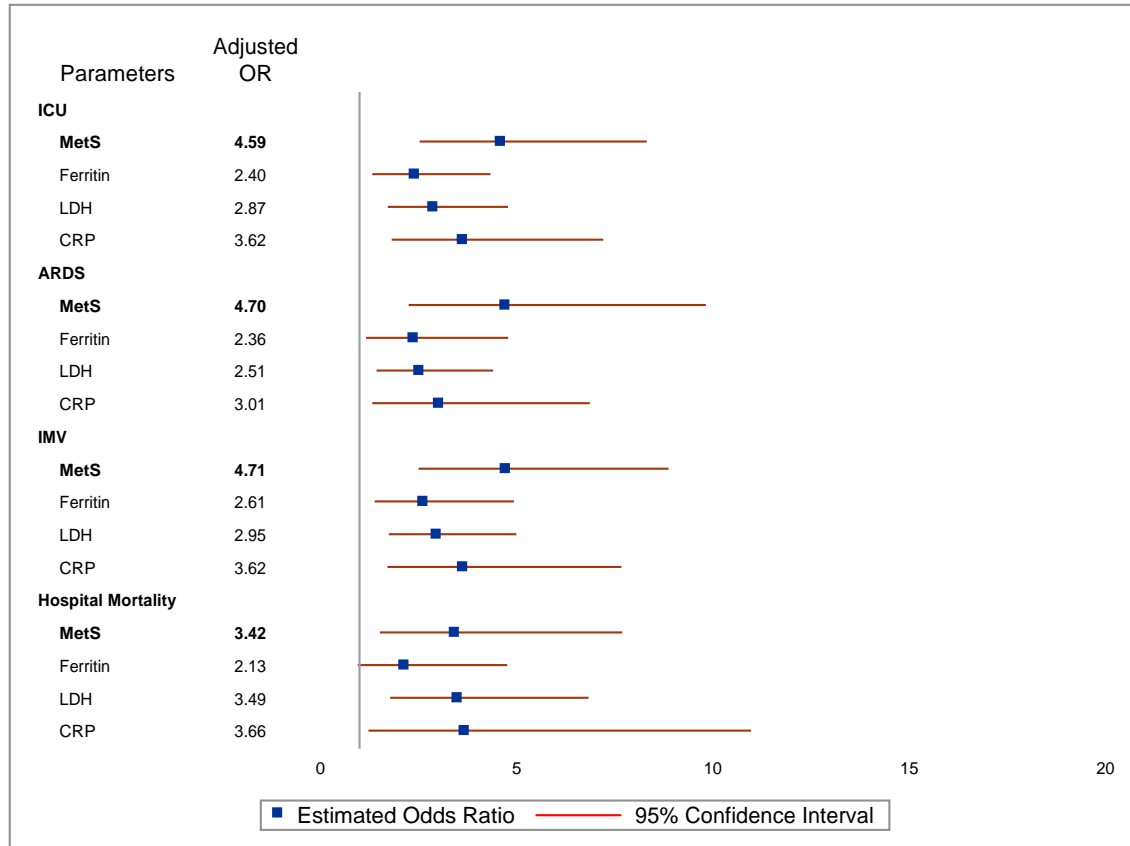

**Supplemental Figure S3: Forrest plot of MetS along with inflammatory markers in Black patients.** Separate multivariable regression analyses for MetS and each inflammatory marker (CRP, LDH, and ferritin) adjusted for age, sex, race/ethnicity, hospital site, and the Charlson Comorbidity Index. MetS=Metabolic Syndrome. Previously described cutoff values shown to correlate with increased disease severity or mortality in COVID-19 were used: CRP>41.2 mg/L<sup>22</sup>, LDH>365 U/L<sup>22</sup>, and Ferritin>300 ng/mL.<sup>1</sup>

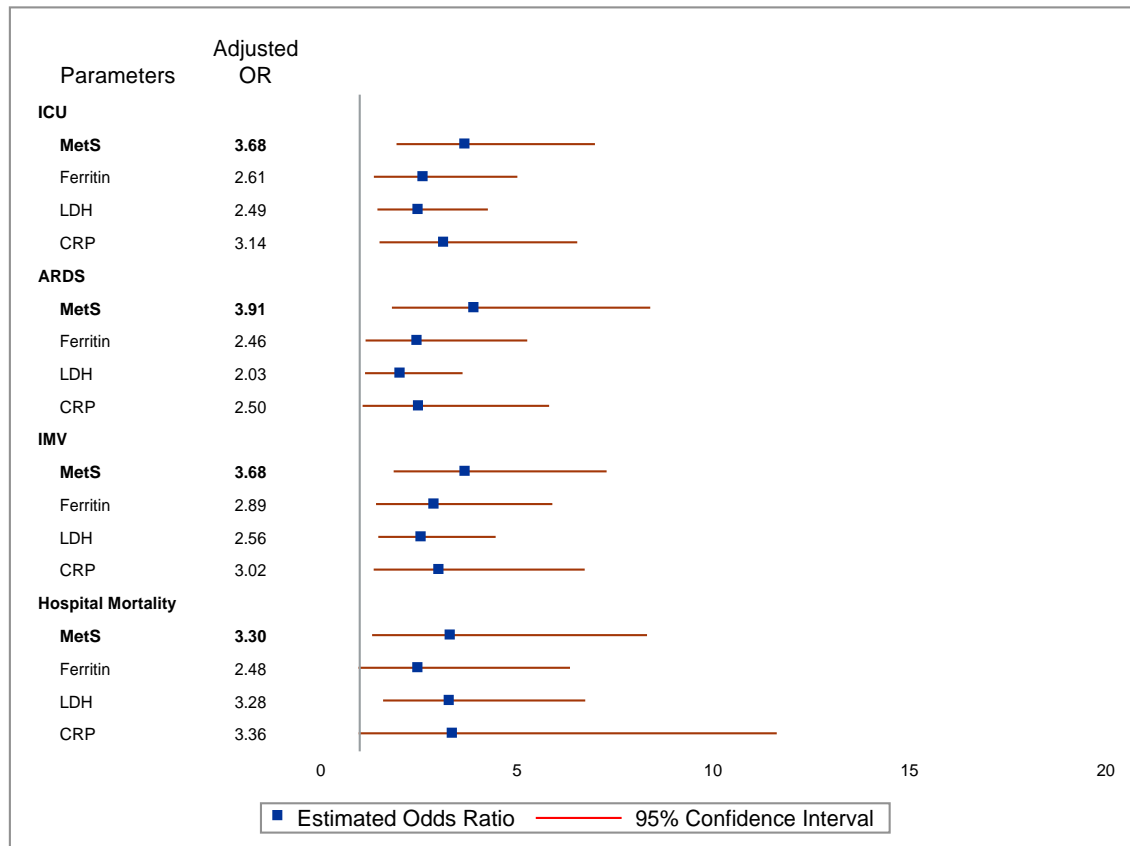

Supplement: Supplementary file 1 [file 24136121]
